# Supplementary material for: BET Proteins Exhibit Transcriptional and Functional Opposition in the Epithelial-to-Mesenchymal Transition
Source: Oxford University Press journal article supplement (doi:10.1158/1541-7786.mcr-17-0568), 2018-02-08
Supplement: 15417786mcr170568-sup-190411_2_supp_4514758_p2rtvr.docx [file 15417786mcr170568-sup-190411_2_supp_4514758_p2rtvr.docx]

**Supplementary Figures Legend**

**Supplementary Fig. S1.** Distinct EMT transcriptomes are attributable to each BET protein in breast cancer cells. **A-B**, Heatmap presenting Z scores of a PCR array of 84 EMT genes expressed upon BET protein depletion (50 nM for three days) in SUM149PT (n=3) (**A**), or MCF-7 cells (n=2) (**B**). **C**, Heatmap presenting Z scores of the PCR array upon BET protein overexpression in MCF-7 cells for three days (n=3). A color code is used to illustrate Z score variations. Normalization is set to scramble.

**Supplementary** **Fig. S2.** Differential control of key EMT transcription factors by BET proteins. (**A**-**B**) mRNA expression of key EMT transcription factors upon BET protein depletion in SUM149PT cells (50 nM for three days) (**A**) or BET protein overexpression for three days in T47D cells (**B**). **C**, mRNA expression of key EMT transcription factors upon pan-BET inhibition with JQ1 (400 nM for three days). Histograms represent means ± SEM of three independent experiments. Statistical analyses were conducted by one-way ANOVA. The following symbols were used to indicate significant differences: ns, *P* > 0.05; **, *P* < 0.01; ***, *P* < 0.001.
