# Supplementary material for: BET Proteins Exhibit Transcriptional and Functional Opposition in the Epithelial-to-Mesenchymal Transition
Source: Oxford University Press journal article supplement (doi:10.1158/1541-7786.mcr-17-0568), 2018-02-08
Supplement: 15417786mcr170568-sup-190411_2_supp_4514759_p318mq.docx [file 15417786mcr170568-sup-190411_2_supp_4514759_p318mq.docx]

| **Supplementary Table S1. Primers sequences used for this study.** | | |
| --- | --- | --- |
| **Genes** | **Forward Sequence (5'-3')** | **Reverse Sequence (5'-3')** |
| *SNAI1* | ACCACTATGCCGCGCTCTT | GCTTTTTCTCCAAAGCCAGTT |
| *SNAI2* | TGTTGCAGTGAGGGCAAGAA | GACCCTGGTTGCTTCAAGGA |
| *SNAI3* | TCCTTCCTGGTGAAAACGCA | CAGAGCTTCCTCGATCCGTG |
| *TWIST1* | GTCCGCAGTCTTACGAGGAG | CCAGCTTGAGGGTCTGAATC |
| *ZEB1* | GATGATGAATGCGAGTCAGATGC | CTGGTCCTCTTCAGGTGCC |
| *ZEB2* | AACAACGAGATTCTACAAGCCTC | TCGCGTTCCTCCAGTTTTCTT |
| **Housekeeping genes** | **Forward Sequence (5'-3')** | **Reverse Sequence (5'-3')** |
| *ACTB* | ATTGGCAATGAGCGGTTCC | GGTAGTTTCGTGGATGCCACA |
| *POLR2A* | ACTTTTGGTACATTGTGGCTTCAA | CCGCCAGGACAAACCAGTAT |

**Supplementary Table 2. List of the EMT genes co-regulated by BET proteins**

| **Genes commonly upregulated** | | |  |
| --- | --- | --- | --- |
| **siBRD2 vs siBRD3** | **siBRD2 vs siBRD4** | **siBRD3 vs siBRD4** |  |
| *EGFR* | *-* | *-* |  |
|  |  |  |  |
| **siBRD2 vs JQ1** | **siBRD3 vs JQ1** | **siBRD4 vs JQ1** |  |
| *-* | *-* | *-* |  |
|  |  |  |  |
| **Genes commonly downregulated** | | | |
| **siBRD2 vs siBRD3** | **siBRD2 vs siBRD4** | **siBRD3 vs siBRD4** |  |
| *VCAN* | *RGS2* | *-* |  |
|  |  |  |  |
| **siBRD2 vs JQ1** | **siBRD3 vs JQ1** | **siBRD4 vs JQ1** |  |
| *AKT1* | *VCAN* | *JAG1* |  |
| *BMP2* |  |  |  |
| *CDH1* |  |  |  |
| *CDH2* |  |  |  |
| *COL3A1* |  |  |  |
| *COL5A2* |  |  |  |
| *ERBB3* |  |  |  |
| *ESR1* |  |  |  |
| *FGFBP1* |  |  |  |
| *FOXC2* |  |  |  |
| *MMP3* |  |  |  |
| *MST1R* |  |  |  |
| *NUDT13* |  |  |  |
| *PDGFRB* |  |  |  |
| *SNA1* |  |  |  |
| *SOX10* |  |  |  |
| *SPARC* |  |  |  |
| *SPP1* |  |  |  |
| *TCF4* |  |  |  |
| *TGFB3* |  |  |  |
| *TMEFF1* |  |  |  |
| *TMEM132A* |  |  |  |
| *TWIST1* |  |  |  |
| *VCAN* |  |  |  |
| *WNT5B* |  |  |  |
| *ZEB2* |  |  |  |
